# Supplementary material for: Health associations of liver enzymes and inflammatory scores with urinary citrus flavonoid metabolites
Source: Royal Society of Chemistry journal article supplement (doi:10.1039/d2fo02846h), 2022-12-23
Supplement: d2fo02846h1.pdf [file d2fo02846h1.pdf]

Supplementary material

**Supplementary material Table 1S.** Dietary intake of vegetables, fruits and whole grains according to sex in the PREDIMED-Plus study (n=267)

|                                    | Total (n= 267) | Men (n= 153) | Women (n= 114) | p-value <sup>¶</sup> |
|------------------------------------|----------------|--------------|----------------|----------------------|
| <b>Vegetables and greens (g/d)</b> |                |              |                |                      |
| Chard, spinach                     | 19.3 (19.3)    | 17.6 (18.5)  | 21.6 (20.2)    | 0.091                |
| Cabbage, caouliflower, broccoli    | 13.8 (10.5)    | 14.2 (10.4)  | 13.4 (10.5)    | 0.579                |
| Lettuce, endives                   | 46.9 (29.1)    | 44.7 (27.3)  | 50.0 (31.1)    | 0.137                |
| Tomato                             | 57.2 (40.8)    | 54.8 (40.0)  | 60.3 (41.7)    | 0.274                |
| Carrot, pumpkin                    | 18.2 (18.0)    | 15.8 (15.7)  | 21.5 (20.3)    | 0.011                |
| Green bean                         | 26.4 (18.6)    | 25.3 (18.3)  | 27.9 (18.9)    | 0.249                |
| Zucchini, eggplant, cucumber       | 29.0 (34.1)    | 27.2 (32.8)  | 31.5 (35.7)    | 0.311                |
| Pepper                             | 31.0 (23.4)    | 28.6 (22.6)  | 34.3 (24.2)    | 0.052                |
| Asparagus                          | 11.6 (13.0)    | 11.4 (11.7)  | 11.7 (14.7)    | 0.883                |
| Gaspacho                           | 9.4 (36.9)     | 11.0 (44.5)  | 7.1 (23.3)     | 0.395                |
| Other vegetables                   | 29.5 (24.9)    | 27.4 (22.1)  | 32.2 (28.1)    | 0.123                |
| Onion                              | 29.7 (13.7)    | 28.3 (14.5)  | 31.6 (12.5)    | 0.051                |
| Garlic                             | 1.8 (0.8)      | 1.7 (0.9)    | 1.9 (0.7)      | 0.179                |
| Mushroom, chantelleres             | 11.5 (13.8)    | 11.9 (14.3)  | 11.0 (13.1)    | 0.603                |
| <b>Fruits (g/d)</b>                |                |              |                |                      |
| Banana                             | 21.7 (35.8)    | 23.2 (39.1)  | 19.8 (30.7)    | 0.443                |
| Apple or pear                      | 109.3 (88.9)   | 102.9 (84.8) | 117.8 (93.9)   | 0.176                |
| Strawberries                       | 5.3 (7.2)      | 5.4 (7.7)    | 5.1 (6.4)      | 0.727                |
| Cherry, plum                       | 14.4 (19.4)    | 14.9 (19.8)  | 13.6 (18.8)    | 0.589                |
| Peach, apricot, nectarine          | 25.7 (29.5)    | 24.7 (29.3)  | 26.9 (29.8)    | 0.550                |
| Watermelon                         | 30.7 (38.4)    | 29.3 (34.0)  | 32.5 (43.7)    | 0.500                |
| Kiwi                               | 20.2 (33.5)    | 14.6 (27.6)  | 27.6 (39.1)    | 0.002                |
| Grape                              | 9.8 (21.8)     | 12.6 (26.4)  | 6.0 (12.4)     | 0.013                |
| Olives                             | 6.8 (10.8)     | 8.7 (12.4)   | 4.3 (7.5)      | 0.001                |
| Raisins, dates, prune, dried figs  | 2.1 (8.1)      | 1.5 (5.7)    | 2.9 (10.4)     | 0.192                |
| Almonds                            | 3.1 (6.8)      | 3.3 (6.9)    | 2.9 (6.8)      | 0.592                |
| Pistachios                         | 1.3 (4.0)      | 1.4 (4.4)    | 1.1 (3.3)      | 0.616                |
| Walnuts                            | 8.5 (10.6)     | 8.8 (10.7)   | 8.2 (10.6)     | 0.646                |
| Other nuts                         | 2.1 (5.7)      | 2.1 (5.5)    | 2.1 (6.1)      | 0.957                |
| <b>Whole grains (g/d)</b>          |                |              |                |                      |
| Muesli, oat flakes, all bran       | 2.3 (8.4)      | 1.6 (6.5)    | 3.3 (10.4)     | 0.114                |
| Integral rice                      | 0.4 (2.1)      | 0.3 (1.5)    | 0.5 (2.7)      | 0.473                |
| Whole wheat pasta                  | 0.3 (1.8)      | 0.1 (0.8)    | 0.5 (2.7)      | 0.109                |

Data were calculated by student's t-test. Results are expressed as mean (standard deviation). p<sup>¶</sup> for differences between sexes.
